# Supplementary material for: Rhein sensitizes human pancreatic cancer cells to EGFR inhibitors by inhibiting STAT3 pathway
Source: PubMed Central journal article supplement (PMC6343257; doi:10.1186/s13046-018-1015-9), 2019-01-23

Figure S3

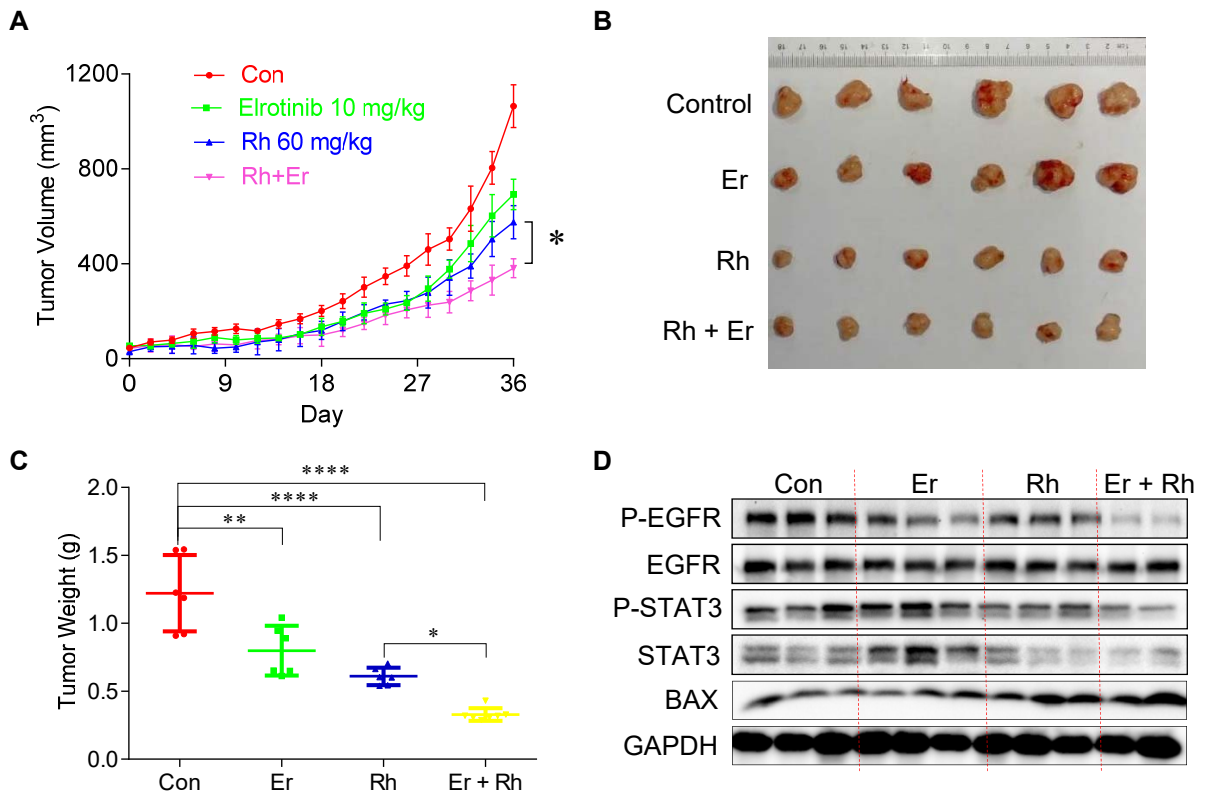

Supplement: 13046_2018_1015_MOESM3_ESM.pdf [file 13046_2018_1015_MOESM3_ESM.pdf]
